# Supplementary material
Source: PubMed Central journal article supplement (PMC4183268)
Supplement: pnas.201402894SI.pdf [file pnas.201402894SI.pdf]

# Supporting Information

Saitta and Saija 10.1073/pnas.1402894111

**Table S1. Summary of the systems simulated in this work**

| System                | M00   | MS01  | MS02  | MS03  | MF01  | DHGF  | DHGW  | Gly   |
|-----------------------|-------|-------|-------|-------|-------|-------|-------|-------|
| H <sub>2</sub> O      | 32    | 8     | 9     | —     | 8     | —     | 10    | 10    |
| NH <sub>3</sub>       | 8     | 8     | 9     | 9     | 8     | —     | —     | —     |
| CH <sub>4</sub>       | 8     | 8     | —     | —     | —     | —     | —     | —     |
| H <sub>2</sub>        | 4     | —     | —     | —     | —     | 10    | 10    | —     |
| N <sub>2</sub>        | —     | 5     | —     | —     | —     | —     | —     | —     |
| CO                    | —     | 10    | —     | —     | 8     | —     | —     | —     |
| Formaldehyde          | —     | —     | 9     | —     | —     | —     | —     | —     |
| HCN                   | —     | —     | 9     | —     | —     | —     | —     | —     |
| Formic acid           | —     | —     | —     | —     | 8     | 10    | —     | —     |
| Formamide             | —     | —     | —     | —     | 8     | —     | —     | —     |
| Dehydroglycine        | —     | —     | —     | —     | —     | 10    | 10    | —     |
| Glycine               | —     | —     | —     | 9     | —     | —     | —     | —     |
| C atoms               | 8     | 18    | 18    | 18    | 24    | 30    | 20    | 20    |
| H atoms               | 128   | 72    | 72    | 72    | 80    | 70    | 70    | 70    |
| O atoms               | 32    | 18    | 18    | 18    | 40    | 40    | 30    | 30    |
| N atoms               | 8     | 18    | 18    | 18    | 16    | 10    | 10    | 10    |
| Cell side, Å          | 11.21 | 11.12 | 11.12 | 11.12 | 12.70 | 12.62 | 11.55 | 11.55 |
| ΔE wrt MS03, kcal/mol | —     | 40.4  | 54.3  | 0.0   | —     | —     | —     | —     |
| ΔE wrt Gly, kcal/mol  | —     | —     | —     | —     | —     | —     | 31.7  | 0.0   |
| Run time 0.00 V/Å, ps | 5.0   | 5.0   | 5.0   | 5.0   | 5.0   | 5.0   | 5.0   | 5.0   |
| Run time 0.25 V/Å, ps | 5.0   | 5.0   | 5.0   | 0.0   | 0.0   | 0.0   | 0.0   | 0.0   |
| Run time 0.35 V/Å, ps | 10.0  | 10.0  | 10.0  | 5.0   | 5.0   | 0.0   | 0.0   | 0.0   |
| Run time 0.50 V/Å, ps | 10.0  | 20.0  | 20.0  | 0.0   | 20.0  | 10.0  | 0.0   | 0.0   |

Starting composition of the simulation boxes, labeled as in the main text and/or in *Supporting Information*: Original Miller, M00; Miller–Strecker first step, MS01; Miller–Strecker second step, MS02; Miller–Strecker third step, MS03; Miller–formamide, MF01; dehydroglycine + formic acid and H<sub>2</sub>, DHGF; dehydroglycine + water and H<sub>2</sub>, DHGW; glycine + water, Gly. For each system we report the initial number of each molecular species, then of each atomic species, the corresponding cubic cell size, chosen as to have, for each system, a density of 1.0 g/mL, the relative average potential energy difference with respect to the reference system (when applicable), and the total simulation time (in picoseconds) for each value of the external electric field.

**Table S2. Relative occurrence of potential transition states, as described in text, with respect to all intermediate states observed within the metadynamics trajectories, at zero and finite field**

| Chemical species           | Occurrence at 0.0 V/Å | Occurrence at 0.5 V/Å | Occurrence at 0.5 V/Å,<br>normalized with respect to 0.0 V/Å |
|----------------------------|-----------------------|-----------------------|--------------------------------------------------------------|
| TS1: CO + NH <sub>2</sub>  | 0.288                 | 0.228                 | 0.272                                                        |
| TS2: COH + NH <sub>3</sub> | 0.014                 | 0.505                 | 0.602                                                        |
| TS3: CO – NH <sub>3</sub>  | 0.698                 | 0.267                 | 0.318                                                        |

In the right column, the values at finite field are normalized with respect to the total occurrence of intermediate states at zero field.

**Table S3. Compatibility table of secondary intermediate states (SIS) with respect to the TS states, and relative occurrence in the MetaDynamics formamide trajectories, at zero and finite field**

| Chemical species            | TS1 | TS2 | TS3 | Occurrence at 0.0 V/Å | Occurrence at 0.5 V/Å |
|-----------------------------|-----|-----|-----|-----------------------|-----------------------|
| SIS1: COH + NH <sub>2</sub> | Y   | Y   | N   | 0.619                 | 0.358                 |
| SIS2: COH – NH <sub>3</sub> | N   | Y   | Y   | 0.110                 | 0.477                 |
| SIS3: CO – NH <sub>2</sub>  | Y   | N   | Y   | 0.271                 | 0.165                 |

Y, yes; N, no.

**Table S4. Relative occurrence of “product” chemical species with respect to the full metadynamics trajectories, at zero and finite field**

| Chemical species | Occurrence at 0.0 V/Å | Occurrence at 0.5 V/Å |
|------------------|-----------------------|-----------------------|
| Formamide        | 0.139                 | 0.103                 |
| Formimidic acid  | 0.001                 | 0.039                 |
| Hydrogen cyanide | 0.086                 | 0.192                 |

**Table S5. Chemical species observed along a molecular dynamics run of the MF01 system under a field up to 0.5 V/Å**

| t, ps | H <sub>2</sub> O | NH <sub>3</sub> | CO | HCN | Formic acid | Formamide | Dehydroglycine | Glyconitriles | Others |
|-------|------------------|-----------------|----|-----|-------------|-----------|----------------|---------------|--------|
| 0.0   | 8                | 8               | 8  | 0   | 8           | 8         | 0              | 0             | 0      |
| 1.5   | 9                | 8               | 8  | 0   | 7           | 7         | 0              | 0             | 1      |
| 2.5   | 9                | 8               | 8  | 0   | 7           | 6         | 0              | 0             | 1      |
| 3.6   | 9                | 8               | 7  | 1   | 8           | 5         | 0              | 0             | 1      |
| 3.8   | 8                | 7               | 6  | 1   | 8           | 5         | 0              | 1             | 1      |
| 4.0   | 8                | 7               | 6  | 1   | 7           | 4         | 1              | 1             | 1      |
| 5.0   | 10               | 7               | 6  | 2   | 7           | 4         | 1              | 1             | 1      |
| 5.5   | 12               | 6               | 5  | 3   | 7           | 5         | 1              | 0             | 1      |
| 7.0   | 14               | 5               | 3  | 5   | 4           | 2         | 1              | 2             | 2      |
